# Supplementary material for: Electrodeposition of nickel–cobalt alloys from metal chloride-l-serine deep eutectic solvent for the hydrogen evolution reaction
Source: Royal Society of Chemistry journal article supplement (doi:10.1039/d4ta02433h), 2024-01-01
Supplement: d4ta02433h1.pdf [file d4ta02433h1.pdf]

## Supporting information

# **Electrodeposition of nickel cobalt alloys from metal chloride-L-serine deep eutectic solvent for hydrogen evolution reaction**

Yanling Hu, Chao Wang\*

*Department of Chemistry and Chemical Engineering, The Youth Innovation Team of Shaanxi  
Universities, Shaanxi University of Science and Technology, Xi'an, Shaanxi 710021, China*

\* Corresponding author:

[cwang@sust.edu.cn](mailto:cwang@sust.edu.cn)

### Content

1. Chemicals
2. Electrochemistry
3. Characterization
4. Electrochemical deposition
5. XRD
6. XPS
7. EDX
8. Electrochemistry
9. Activity comparison

## 1. Chemicals

Nickel chloride hexahydrate ( $\text{NiCl}_2 \cdot 6\text{H}_2\text{O}$ ; Sinopharm; 98%), cobalt chloride hexahydrate ( $\text{CoCl}_2 \cdot 6\text{H}_2\text{O}$ ; Damao; 99%), L-serine (99%, AR grade), potassium hydroxide (KOH; Guanghai; 85%), ethanol ( $\text{C}_2\text{H}_5\text{OH}$ ; Guanghai; 99.7%), carbon cloth ( $1 \times 2 \text{ cm}^2$ ), foam nickel ( $1 \times 2 \text{ cm}^2$ ), silver wire (diameter 0.5 mm), graphite rod (diameter 6mm), saturated calomel electrode (Shanghai Insea), and glassy carbon electrode (diameter 2 mm).

## 2. Electrochemistry

The potential reported is relative to the reversible hydrogen electrode (RHE), and the conversion equations for potential are shown in the following Eqns. (S1) - (S2)

$$E_{\text{RHE}} = E_{\text{SCE}} + 0.059 \cdot \text{pH} + 0.241 \quad (\text{S1})$$

$$\eta_{\text{RHE}} = E_{\text{RHE}} \quad (\text{S2})$$

$E_{\text{RHE}}$  represents the potential relative to the reversible hydrogen electrode (RHE),  $E_{\text{SCE}}$  represents the potential relative to the saturated calomel electrode (SCE), and  $\eta$  represents the overpotential. with the formula shown in Eqn (S3).

$$E_{\text{iR-corrected}} = E_{\text{RHE}} - iR \quad (\text{S3})$$

Tafel slope ( $b$ ) is shown in Eqn (S4)

$$\eta = b \log j \quad (\text{S4})$$

The double-layer capacitance ( $C_{\text{dl}}$ ) was measured using cyclic voltammetry (CV) at a scan rate of 20 - 100 mV s<sup>-1</sup>. All electrochemical experiments are repeated at least three times.

## **2. Characterization**

The phase characterization studied using X-ray powder diffraction (XRD, Rigaku D/Max-3c, Japan). The microstructure of the catalyst and the elemental distribution of the samples were observed using a field emission scanning electron microscope (ZEISS Sigma 300, Germany) and an energy-dispersive X-ray spectrometer (EDX). Transmission electron microscopy (TEM) and high-resolution TEM (HRTEM) measurements were conducted using a field emission electron microscope (JEOL JEM F200, Japan). The elemental composition and valence state of the samples were determined using X-ray photoelectron spectroscopy (XPS, Shimadzu/Kratos, Japan).

### 3. Electrochemical deposition

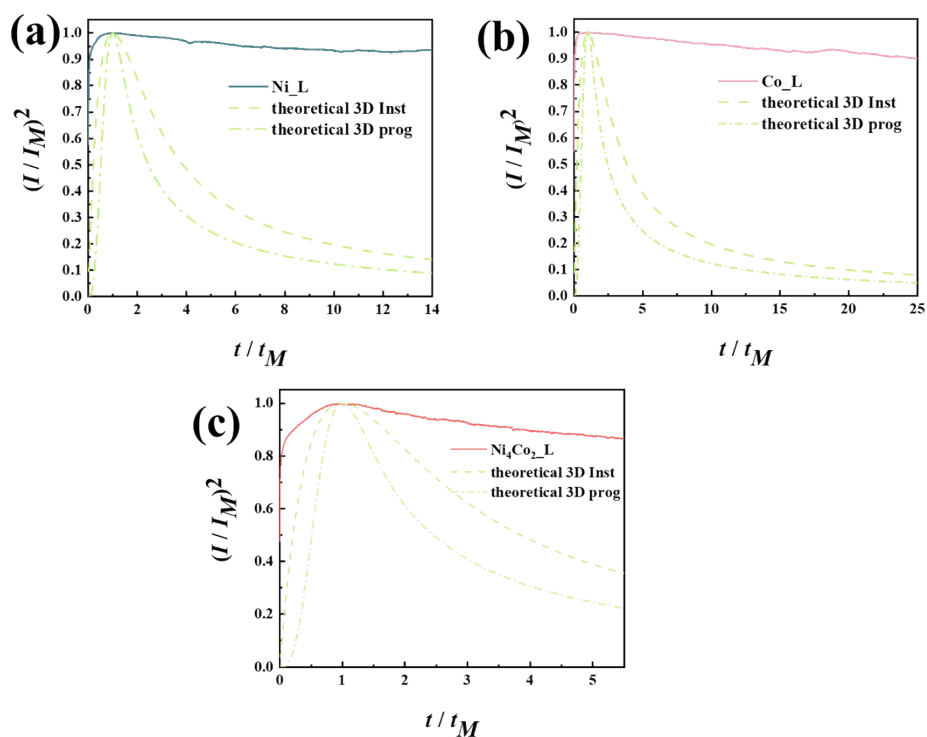

**Fig. S1.** Non-dimensional  $(I / I_M)^2$  vs.  $(t / t_M)$  curves of deposition on nickel foam for the electrodeposition of (a) Ni\_L, (b) Co\_L and Ni<sub>4</sub>Co<sub>2</sub>\_L at -1.4 V<sub>Ag</sub> .

**Equations :**

$$\text{Theoretical 3D Inst : } (I / I_M)^2 = 1.9542 / (t / t_M) * [1 - \exp(-1.2564 * x)]^2$$

$$\text{Theoretical 3D Prog : } (I / I_M)^2 = 1.2254 / (t / t_M) * [1 - \exp(-2.336 * x^2)]^2$$

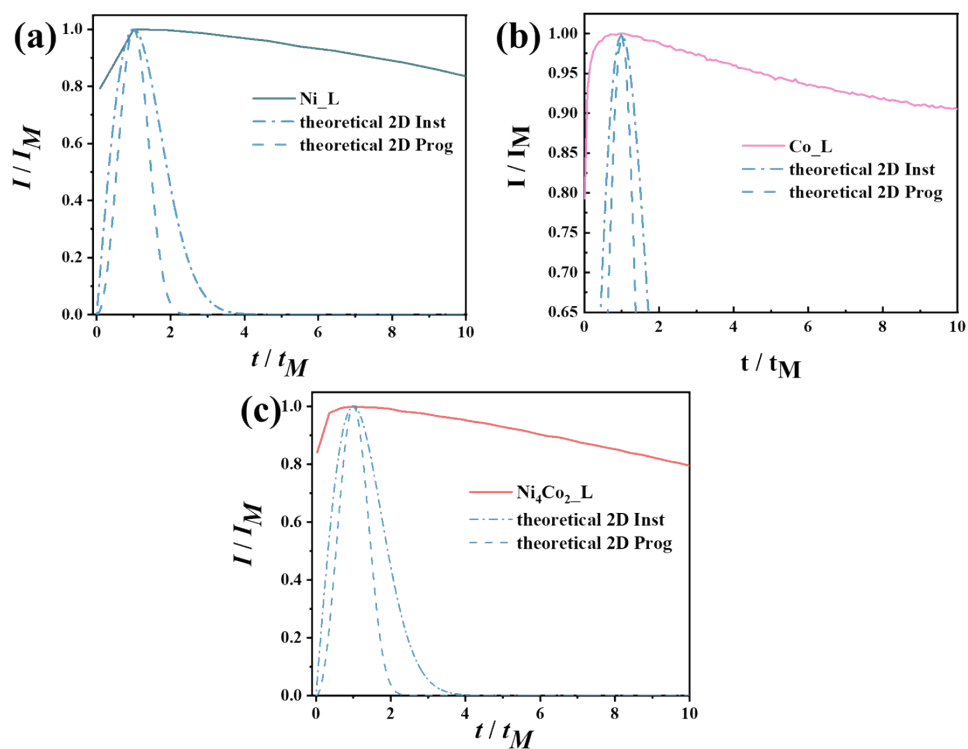

**Fig. S2.** Non-dimensional  $(I / I_M)^2$  vs.  $(t / t_M)$  curves for the electrodeposition from (a) Ni\_L, (b) Co\_L and (c) Ni<sub>4</sub>Co<sub>2</sub>\_L using glassy carbon electrode at  $-1.4V_{Ag}$ .

**Equations :**

**Theoretical 2D Inst :**  $(I / I_M) = x \cdot \{\exp((-1/2) \cdot (x^2 - 1))\}$

**Theoretical 2D Prog :**  $(I / I_M) = x^2 \cdot \{\exp((-2/3) \cdot (x^3 - 1))\}$

#### 4. XRD

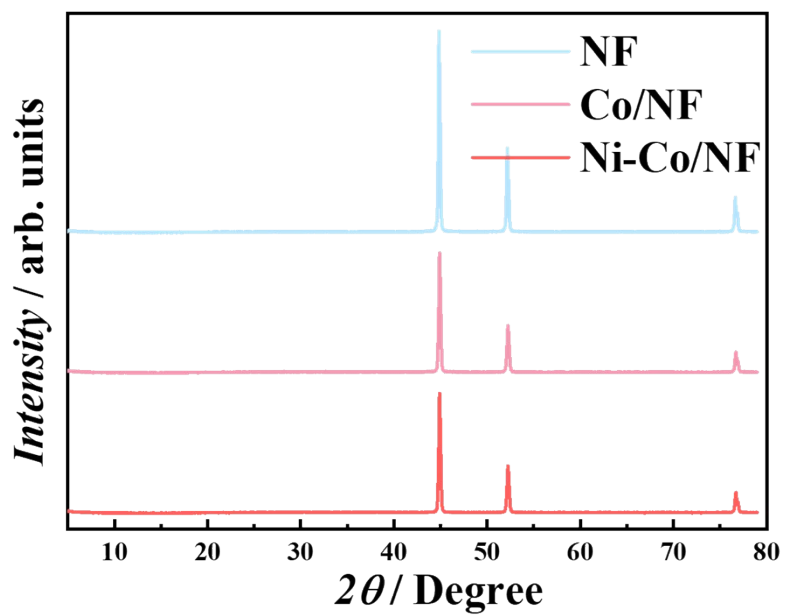

Fig. S3. XRD spectra of Ni-Co on nickel foam.

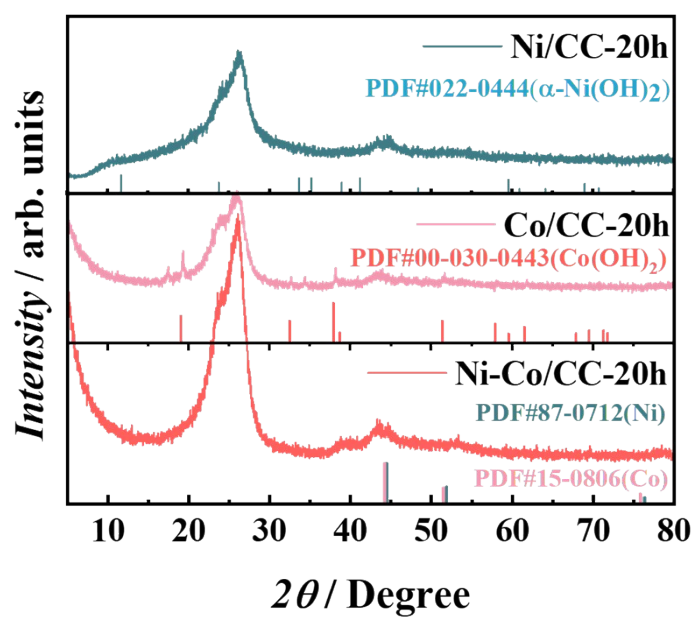

Fig. S4. XRD of Ni/CC, Co/CC, Ni-Co/CC after long-term galvanostatic test.

## 5. XPS

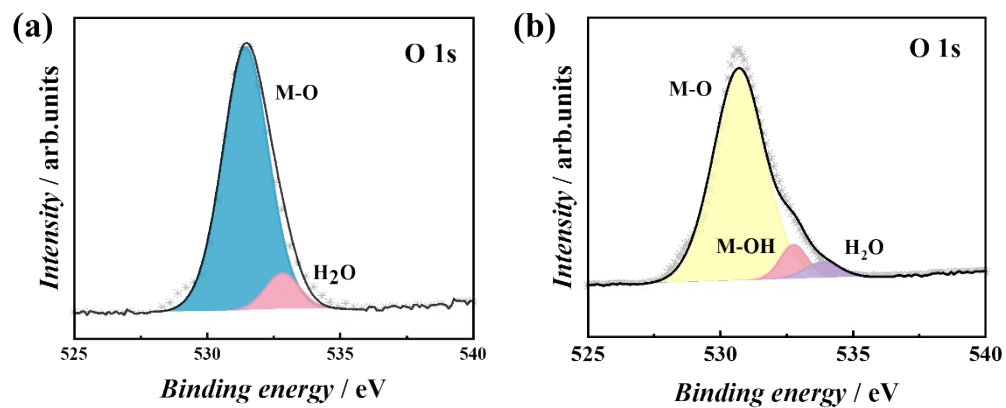

**Fig. S5.** (a) O 1 s region of Ni-Co in 1M KOH. (b) O 1 s region of Ni-Co after long-term galvanostatic test in 1M KOH.



## 6. EDX

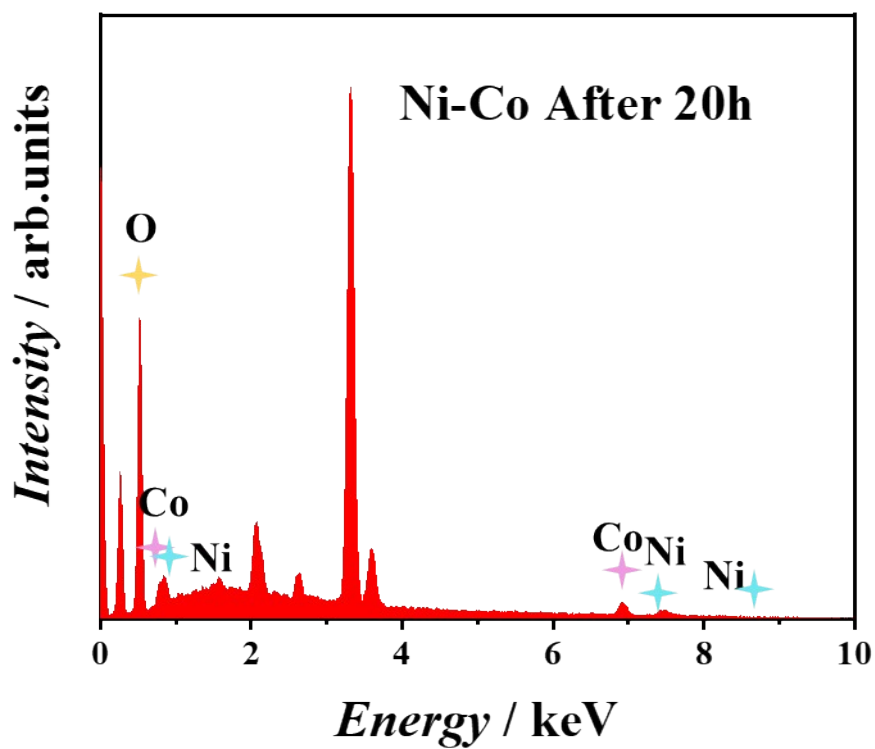

Fig. S6. EDX of Ni Co after long-term galvanostatic HER test.

## 7. Electrochemistry

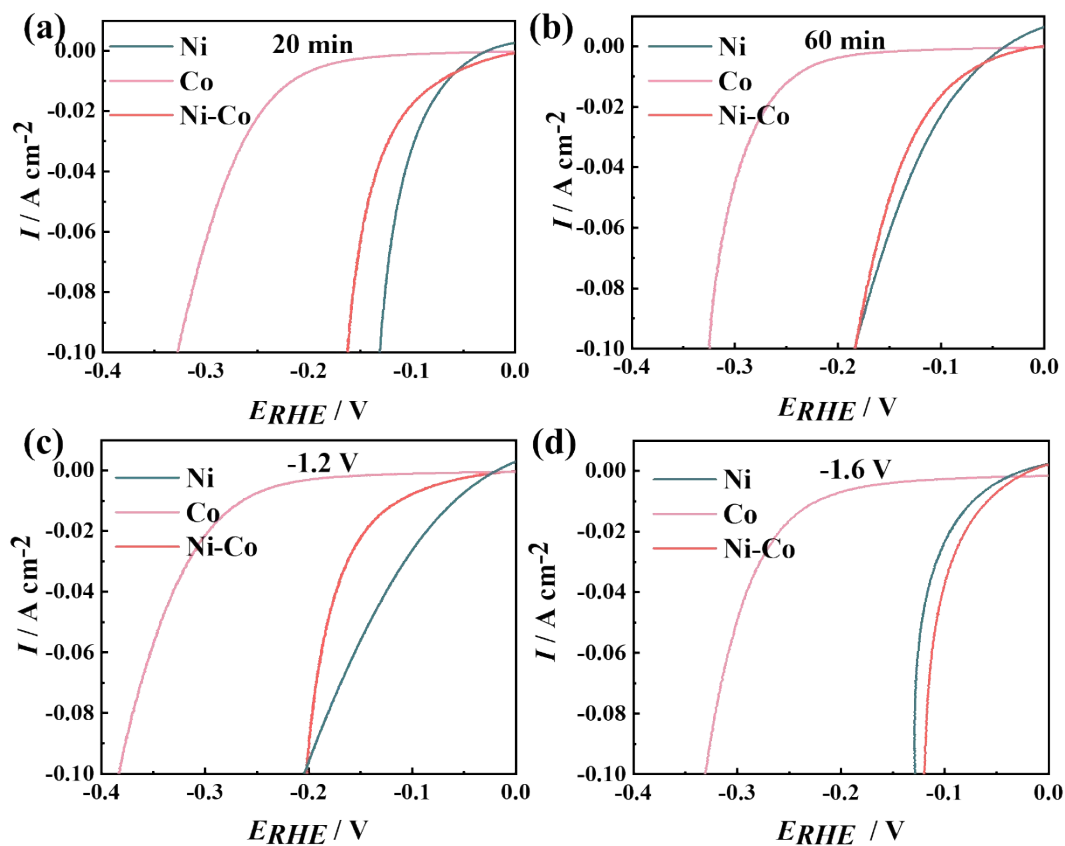

**Fig. S7.** LSV of Ni, Co and Ni-Co in 1 M KOH  $5 \text{ mV s}^{-1}$ . The electrodes are electrodeposited under different conditions. (a) 20 min and (b) 60 min at  $-1.4 \text{ V}_{\text{Ag}}$ ; (c)  $-1.2 \text{ V}_{\text{Ag}}$  and (d)  $-1.6 \text{ V}_{\text{Ag}}$  for 40 min.

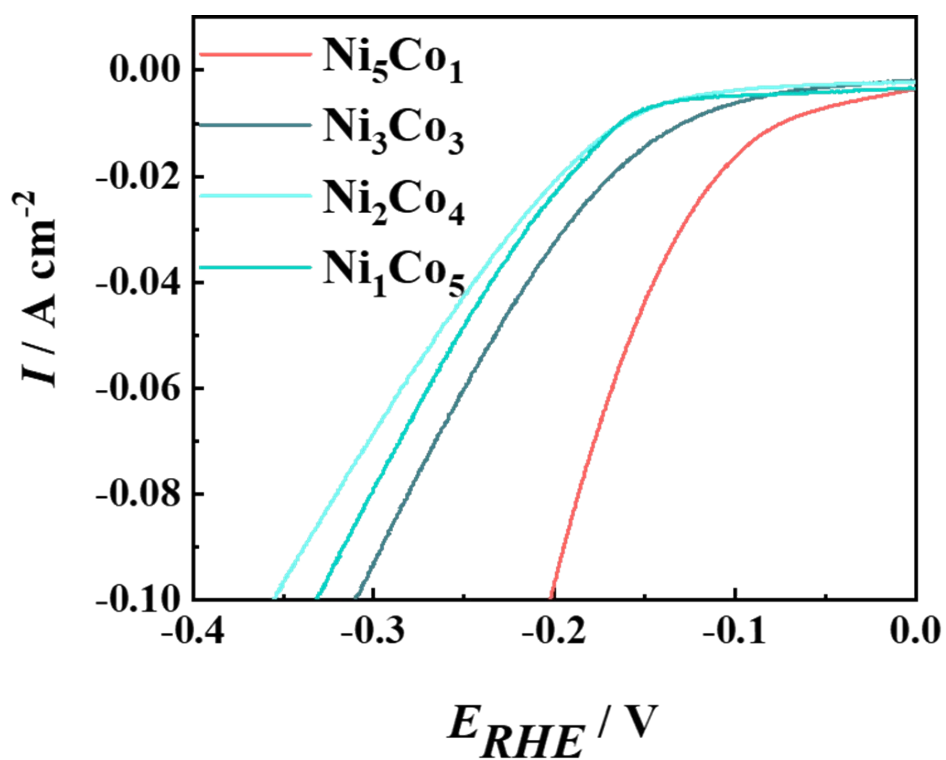

**Fig. S8.** LSV of Ni-Co in 1 M KOH at  $5 \text{ mV s}^{-1}$ . The Ni-Co electrodes are electrodeposited using DES containing different proportions of Ni and Co.

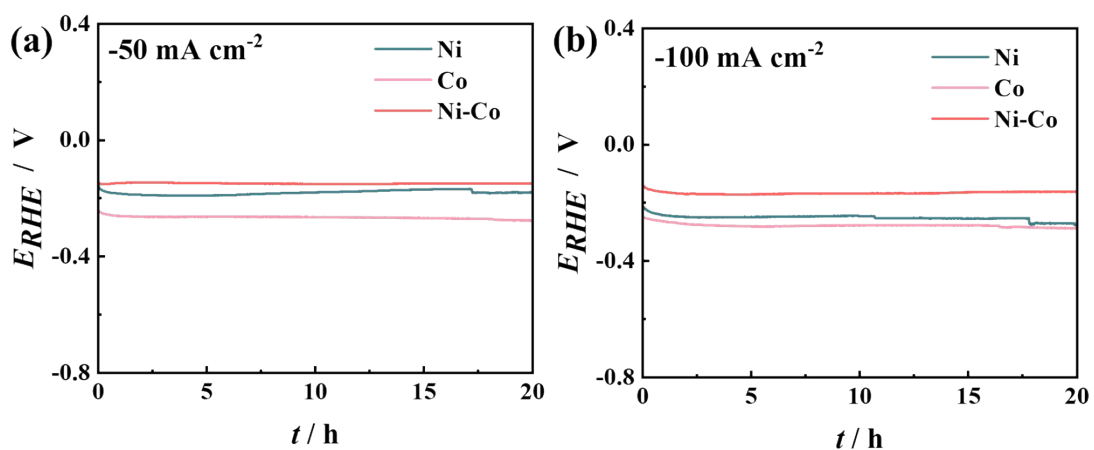

**Fig. S9.** The galvanostatic HER at (a)  $-50 \text{ mA cm}^{-2}$  and (b)  $-100 \text{ mA cm}^{-2}$  in 1 M KOH.

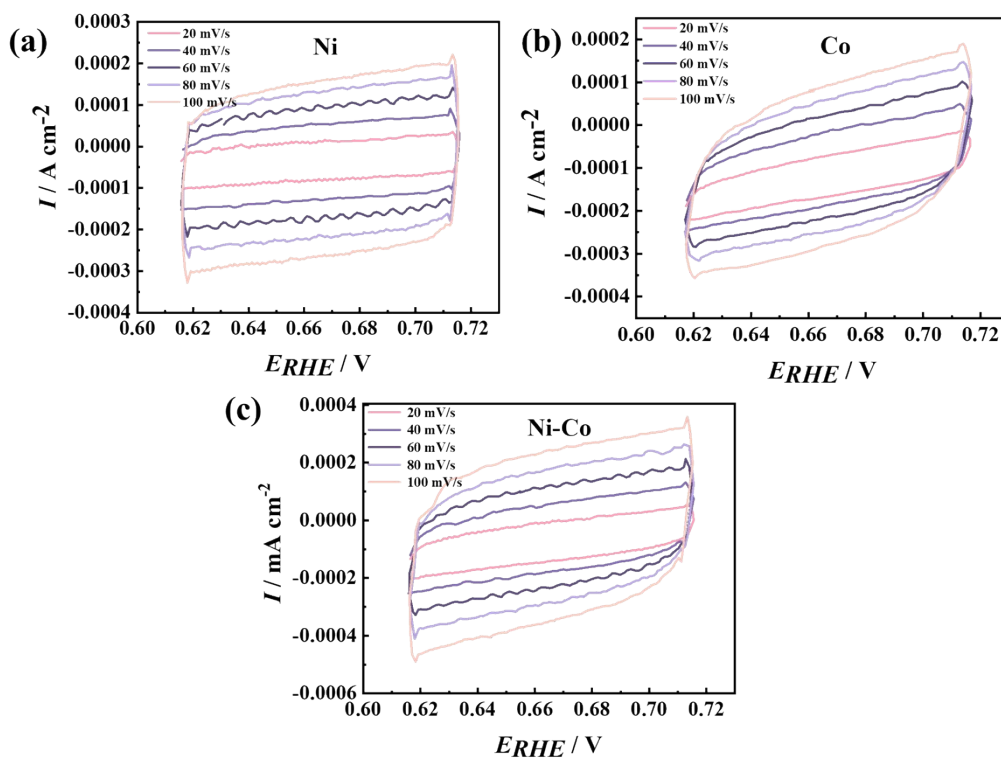

**Fig. S10.** (a-e) CV of Ni, Co, and Ni-Co at different scan rates (20, 40, 60, 80, and 100  $\text{mV s}^{-1}$ ) in 0.62 - 0.71 V in 1 M KOH.

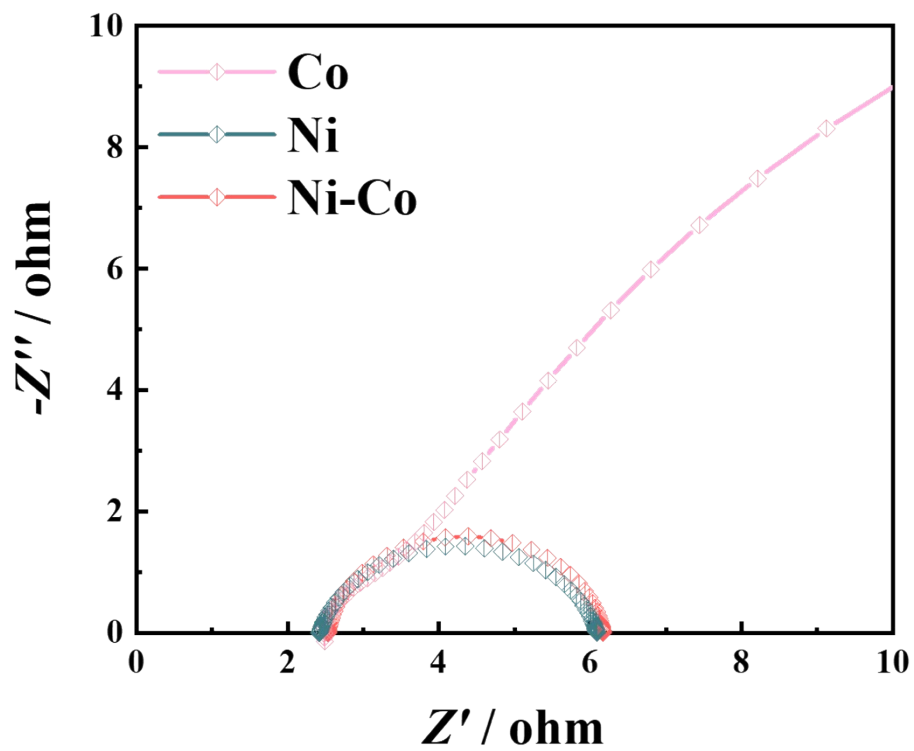

**Fig. S11** Nyquist plots (dots) and the fitting curves (line) of the Ni-Co in 1 M KOH at

$-0.0889 V_{\text{RHE}}$ .

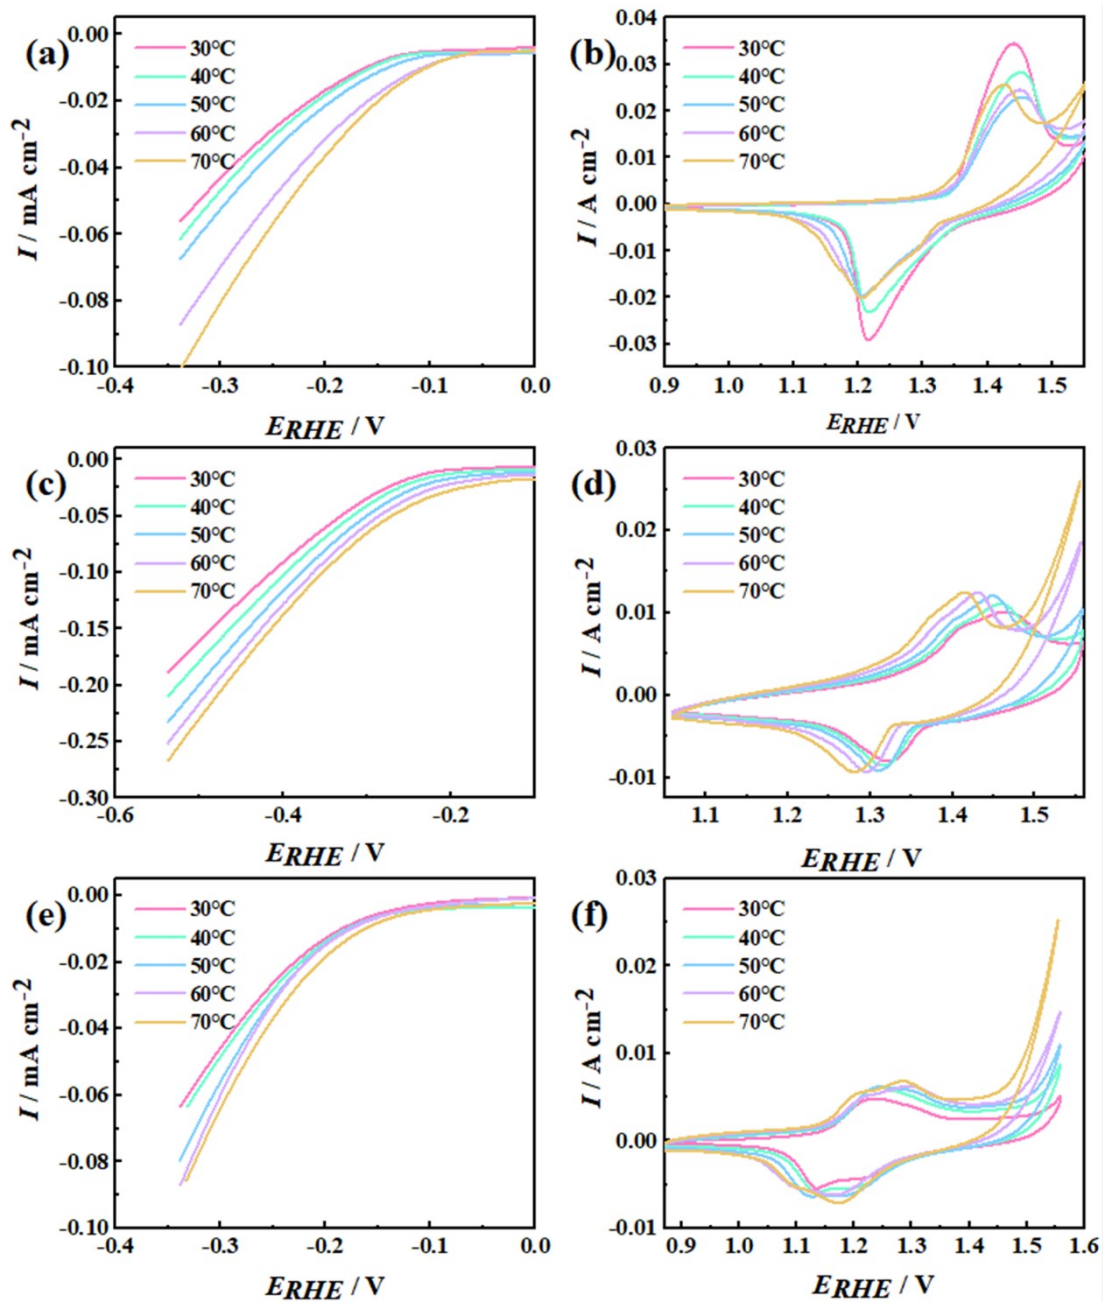

**Fig. S12.** The LSV and CV of the (a, d) Ni, (b, e) Co, and (c, f) Ni-Co at different temperatures in 1 M KOH at scan rate 5 mV s<sup>-1</sup>.

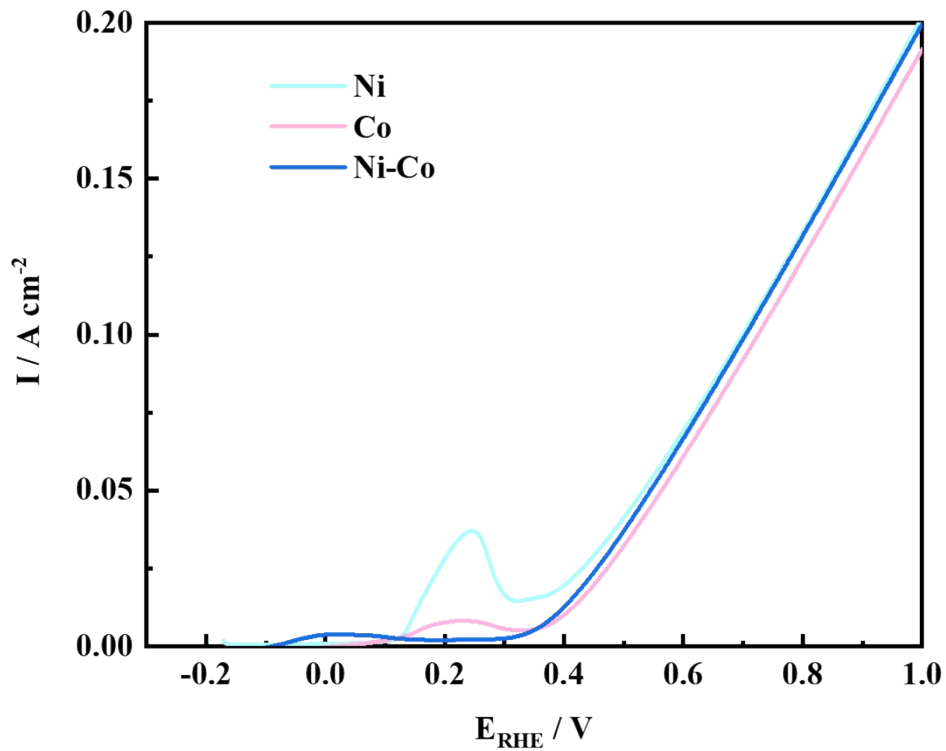

Fig. S13. LSV for OER of the Ni、Co and Ni-Co in 1 M KOH with  $5 \text{ mV s}^{-1}$

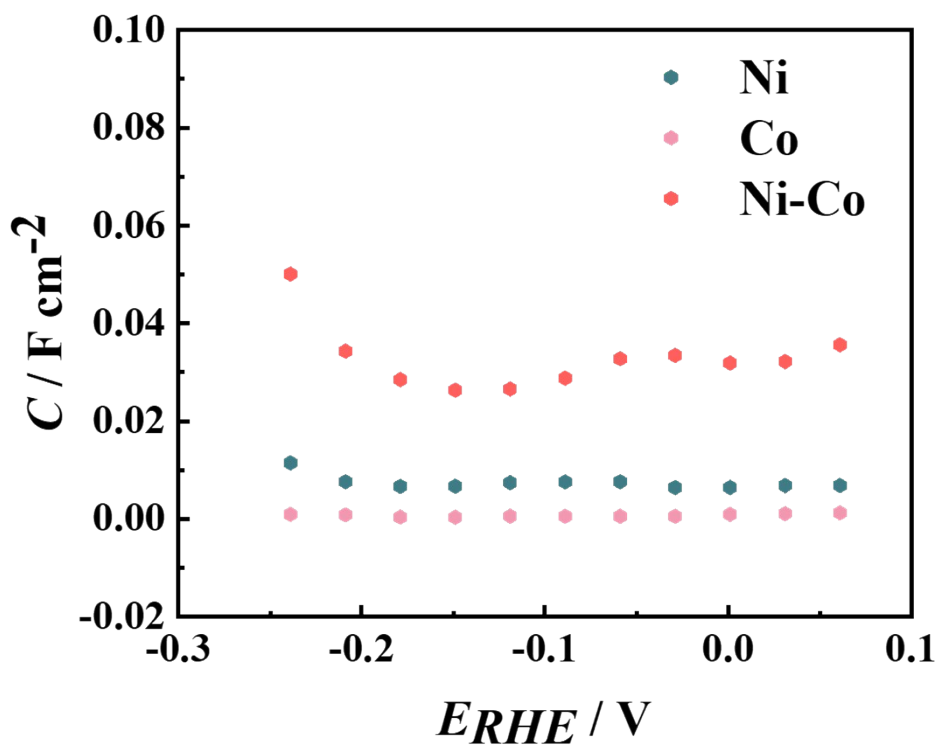

Fig. S14.  $C$  vs  $E$  curves of Ni, Co and Ni-Co obtained from electrochemical impedance spectroscopy in 1 M KOH





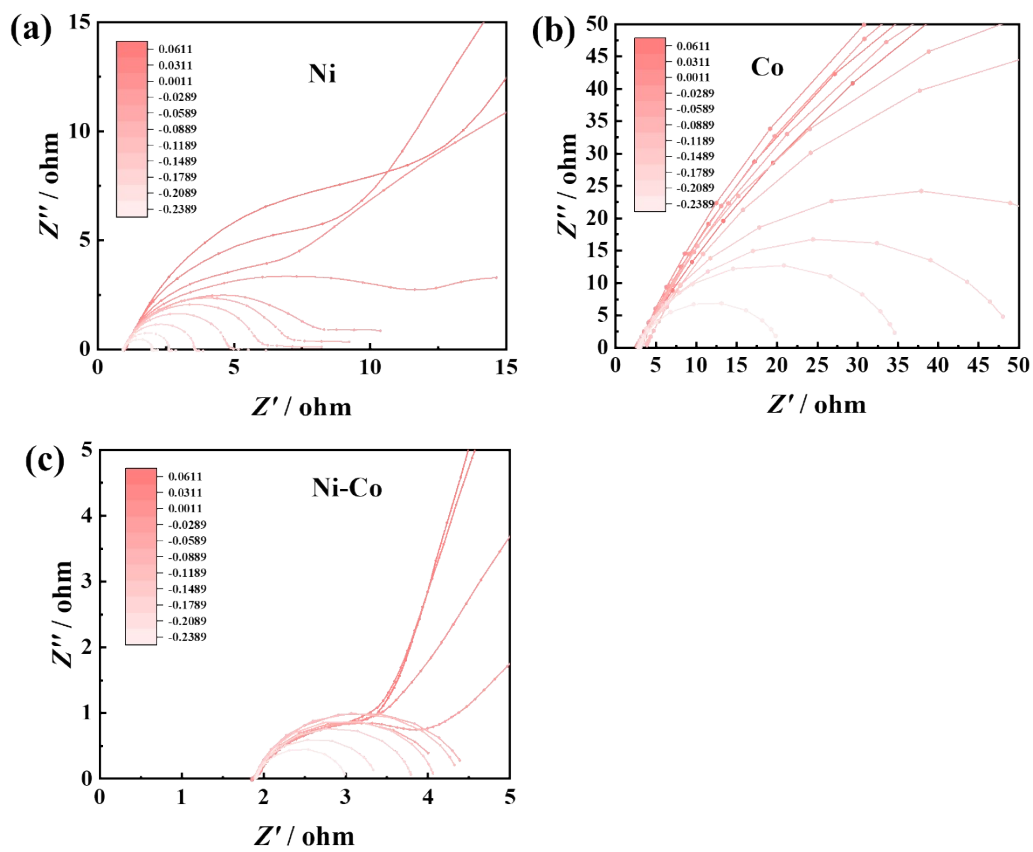

**Fig. S15** Nyquist plots of the (a) Ni, (b) Co and (c) Ni-Co at different potentials.

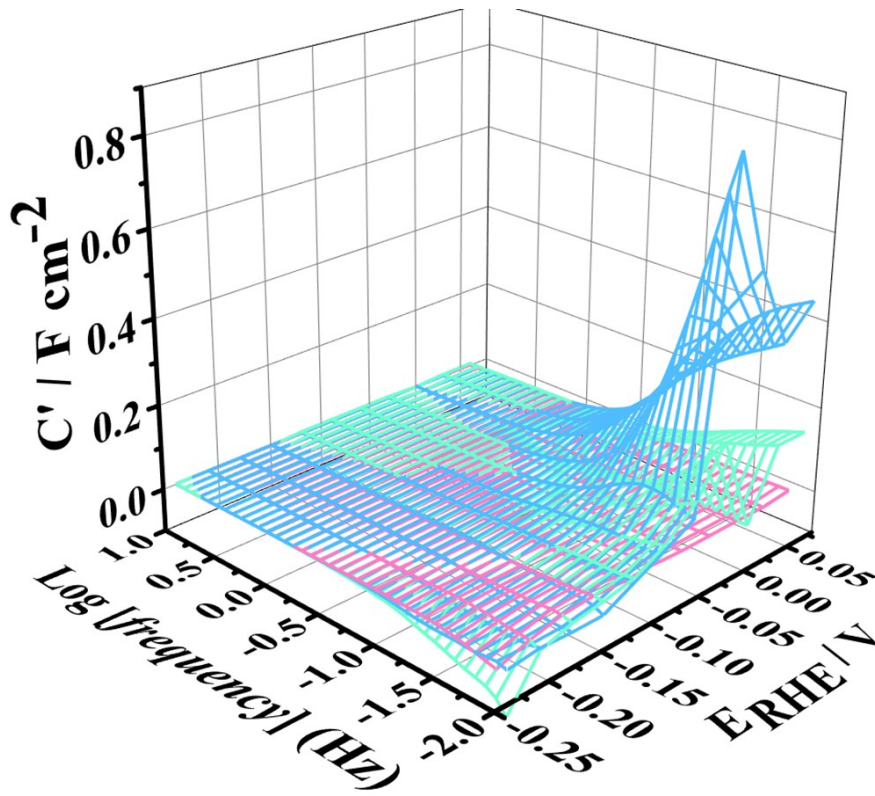

**Fig. S16.** 3D Bode plots of real area-normalized capacitance ( $C'$ ) vs. frequency vs. potential for Ni, Co and Ni-Co in 1 M KOH.

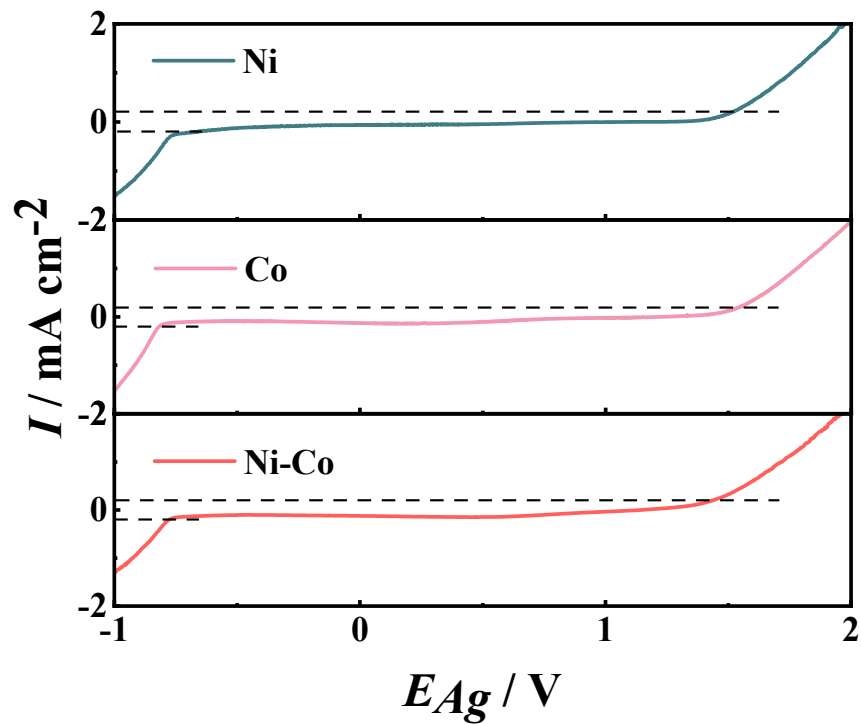

**Fig. S17.** Cathodic LSV of the DES at 300 K and  $50 \text{ mV s}^{-1}$ . The working is electrode is a GC.

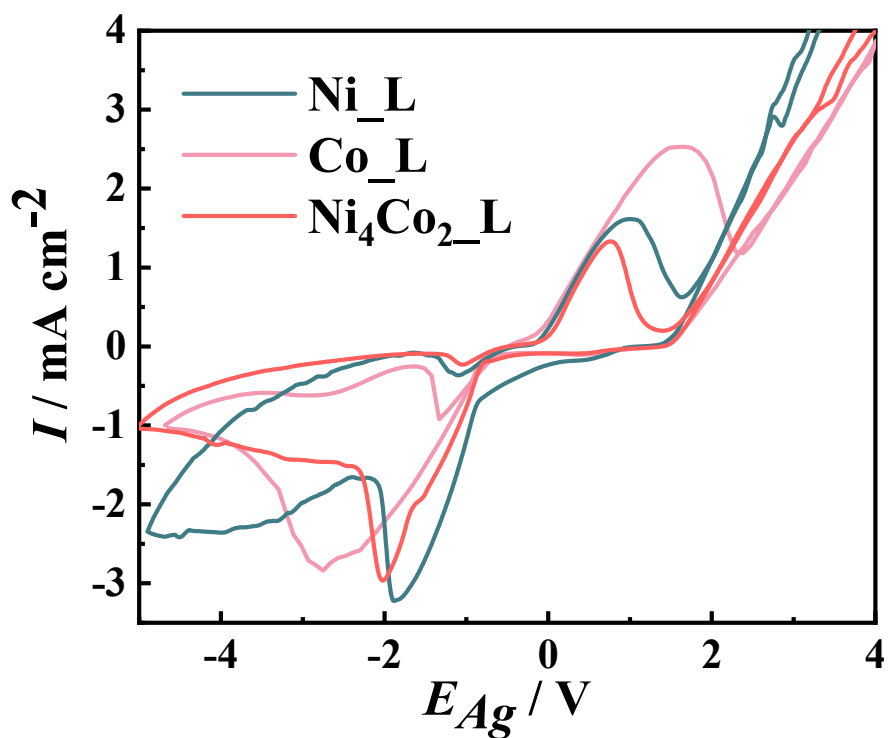

**Fig. S18.** Cathodic CV of the DES at 300 K and  $50 \text{ mV s}^{-1}$ . The working is electrode is a GC.

**Table S1.** EIS fitting results

| $E / V_{\text{RHE}}$ | $R / \Omega$ | $R_{\text{ct}} / \Omega$ | CPE-T    | CPE-P   |
|----------------------|--------------|--------------------------|----------|---------|
| Ni                   |              |                          |          |         |
| 0.0611               | 1            | 22.35                    | 0.023578 | 0.80265 |
| 0.0311               | 0.98871      | 15.03                    | 0.021799 | 0.81021 |
| 0.0011               | 0.97287      | 10.34                    | 0.019951 | 0.80664 |
| -0.0289              | 0.94357      | 11.19                    | 0.027351 | 0.73391 |
| -0.0589              | 0.95412      | 7.103                    | 0.023818 | 0.79649 |
| -0.0889              | 0.95541      | 6.084                    | 0.018986 | 0.83994 |
| -0.1189              | 0.95287      | 5.078                    | 0.016134 | 0.86197 |
| -0.1489              | 0.94839      | 3.897                    | 0.012915 | 0.88094 |
| -0.1789              | 0.94496      | 2.649                    | 0.010377 | 0.89715 |
| -0.2089              | 0.94186      | 1.696                    | 0.008702 | 0.90989 |
| -0.2389              | 0.9375       | 1.068                    | 0.009077 | 0.90219 |
| Co                   |              |                          |          |         |
| 0.0611               | 2.485        | 326.1                    | 0.008846 | 0.71671 |
| 0.0311               | 2.723        | 274.6                    | 0.005383 | 0.76886 |
| 0.0011               | 2.592        | 310.5                    | 0.004482 | 0.78116 |
| -0.0289              | 2.501        | 340.9                    | 0.003164 | 0.75383 |
| -0.0589              | 2.988        | 250.7                    | 0.00287  | 0.77156 |
| -0.0889              | 2.909        | 166.2                    | 0.002469 | 0.79003 |
| -0.1189              | 3.776        | 121.2                    | 0.002445 | 0.80387 |
| -0.1489              | 2.799        | 68.13                    | 0.001561 | 0.78503 |
| -0.1789              | 2.881        | 46.9                     | 0.001628 | 0.79335 |
| -0.2089              | 2.809        | 32.29                    | 0.002471 | 0.85302 |
| -0.2389              | 2.968        | 17.36                    | 0.002595 | 0.85831 |
| Ni-Co                |              |                          |          |         |
| 0.0611               | 1.888        | 2.51                     | 0.081752 | 0.75838 |
| 0.0311               | 1.884        | 2.672                    | 0.079144 | 0.73844 |
| 0.0011               | 1.864        | 2.625                    | 0.075552 | 0.73766 |
| -0.0289              | 1.88         | 2.481                    | 0.072087 | 0.77499 |
| -0.0589              | 1.89         | 2.323                    | 0.060047 | 0.81356 |
| -0.0889              | 1.899        | 2.565                    | 0.047341 | 0.84904 |
| -0.1189              | 1.903        | 2.474                    | 0.038162 | 0.86889 |
| -0.1489              | 1.904        | 2.174                    | 0.032836 | 0.87226 |
| -0.1789              | 1.909        | 1.884                    | 0.031987 | 0.86773 |
| -0.2089              | 1.905        | 1.455                    | 0.024693 | 0.88422 |
| -0.2389              | 1.904        | 1.092                    | 0.023016 | 0.88192 |

## 8. Activity comparison

Table S2. HER Activity comparison

| Catalysts                                | Method                                         | $\eta$ at 10 mA cm <sup>-2</sup> / mV | Tafel slope / mV dec <sup>-1</sup> | Stability/h | References |
|------------------------------------------|------------------------------------------------|---------------------------------------|------------------------------------|-------------|------------|
| Ni-Co                                    | Electrodeposition                              | 62                                    | 63.5                               | 20          | Our work   |
| NiCo nanowires                           | Template-assisted electrodeposition            | 103                                   | 104                                | 20          | 1          |
| NiCo                                     | Hydrogen bubble template                       | 54                                    | 26                                 | 10          | 2          |
| NiCo                                     | Sputtering                                     | 53                                    | 68.08                              | \           | 3          |
| NiCo/GP                                  | Electrodeposition                              | 107                                   | 119                                | 10          | 4          |
| NiCo-300                                 | Hydrothermal                                   | 156                                   | 82.7                               | 12          | 5          |
| SFCA-NiCo                                | Hydrogel annealing                             | 179                                   | 45.6                               | 24          | 6          |
| CoNi/NF                                  | Electrodeposition                              | 77                                    | 94                                 | 10          | 7          |
| NiCo/NiCoOx                              | Hydrothermal                                   | 155                                   | 35                                 | 10          | 8          |
| Co <sub>0.5</sub> Ni <sub>0.5</sub> P/CC | Hydrothermal + Low-temperature phosphidization | 47                                    | 34.1                               | 30          | 9          |
| Ni-Co/Cu                                 | Electrodeposition                              | 131                                   | 193                                | 11          | 10         |
| Ni-Co                                    | Electrodeposition                              | 86.7                                  | 69.3                               | 10          | 11         |
| Ni <sub>0.5</sub> Co <sub>0.5</sub>      | Electroless deposition                         | 36                                    | 34.1                               | 96          | 12         |

**Table S3.** Ni 2p<sub>3/2</sub> and Ni 2p<sub>1/2</sub> spectral fitting parameters: binding energy (eV), percentage of total area, FWHM value (eV).

|                      | Peak1(eV) | FWHM(eV) | %     | Peak2(eV) | FWHM(eV) | %     | Peak3(eV) | FWHM(eV) | %     |
|----------------------|-----------|----------|-------|-----------|----------|-------|-----------|----------|-------|
| Ni 2p <sub>3/2</sub> |           |          |       |           |          |       |           |          |       |
| Ni                   | 853.59    | 1.260    | 1.88  | 856.28    | 2.822    | 33.33 | 862.06    | 5        | 32.17 |
| Ni-Co                | 852.12    | 1.260    | 4.07  | 855.63    | 2.867    | 32.19 | 861.37    | 5        | 30.49 |
| Ni-Co-20h            | 852.94    | 1.260    | 2.30  | 854.95    | 2.678    | 34.01 | 860.86    | 5        | 31.20 |
| Ni 2p <sub>1/2</sub> |           |          |       |           |          |       |           |          |       |
| Ni                   | 873.58    | 2.822    | 16.60 | 879.33    | 5        | 16.03 |           |          |       |
| Ni-Co                | 869.41    | 1.260    | 2.03  | 872.93    | 2.867    | 16.04 | 878.67    | 5        | 15.19 |
| Ni-Co-20h            | 872.25    | 2.678    | 16.95 | 878.16    | 5        | 15.54 |           |          |       |

**Table S4.** Co 2p<sub>3/2</sub> and Co 2p<sub>1/2</sub> spectral fitting parameters: binding energy (eV), percentage of total area, FWHM value (eV).

|                      | Peak1(eV) | FWHM(eV) | %     | Peak2(eV) | FWHM(eV) | %     | Peak3(eV) | FWHM(eV) | %     |
|----------------------|-----------|----------|-------|-----------|----------|-------|-----------|----------|-------|
| Co 2p <sub>3/2</sub> |           |          |       |           |          |       |           |          |       |
| Co                   | 779.67    | 1.633    | 15.11 | 781.01    | 2.786    | 38.55 | 786.24    | 5        | 18.13 |
| Ni-Co                | 777.77    | 0.572    | 2.03  | 780.80    | 3.152    | 41.21 | 785.83    | 5        | 25.20 |
| Ni-Co-20h            | 779.06    | 1.363    | 10.66 | 780.34    | 2.780    | 41.85 | 786.20    | 5        | 17.80 |
| Co 2p <sub>1/2</sub> |           |          |       |           |          |       |           |          |       |
| Co                   | 796.00    | 2.786    | 19.18 | 801.23    | 5        | 9.03  |           |          |       |
| Ni-Co                | 795.79    | 3.152    | 20.01 | 800.82    | 5        | 12.55 |           |          |       |
| Ni-Co-20h            | 795.33    | 2.780    | 20.85 | 801.19    | 5        | 8.86  |           |          |       |

## Reference

1. F. Wang, X. Feng, N. Wang, H. Guan, S. Bian, X. Hao and Y. Chen, *Colloids and Surfaces A: Physicochemical and Engineering Aspects*, 2021, **615**.
2. J. Wang, H. Shao, S. Ren, A. Hu and M. Li, *Applied Surface Science*, 2021, **539**.
3. N. S. Gultom, M. Z. Silitonga and D.-H. Kuo, *ACS Applied Energy Materials*, 2022, **5**, 8658-8668.
4. G. B. Darband, M. Aliofkhazraei, A. S. Rouhaghdam and M. A. Kiani, *Applied Surface Science*, 2019, **465**, 846-862.
5. B. Zhang, X. Zhang, Y. Wei, L. Xia, C. Pi, H. Song, Y. Zheng, B. Gao, J. Fu and P. K. Chu, *Journal of Alloys and Compounds*, 2019, **797**, 1216-1223.
6. D. K. Sam, W. Wang, S. Gong, E. K. Sam, X. Lv, J. Wang and J. Liu, *International Journal of Hydrogen Energy*, 2021, **46**, 21525-21533.
7. J. Bai, Q. Sun, Z. Wang and C. Zhao, *Journal of The Electrochemical Society*, 2017, **164**, H587.
8. X. Yan, K. Li, L. Lyu, F. Song, J. He, D. Niu, L. Liu, X. Hu and X. Chen, *ACS Applied Materials & Interfaces*, 2016, **8**, 3208-3214.
9. X. Zhang, W. Gu and E. Wang, *Journal of Materials Chemistry A*, 2017, **5**, 982-987.
10. A. Maurya, S. Suman, A. Bhardwaj, L. Mohapatra and A. K. Kushwaha, *Electrocatalysis*, 2022, **14**, 68-77.
11. X. Zhang, Y. Li, Y. Guo, A. Hu, M. Li, T. Hang and H. Ling, *International Journal of Hydrogen Energy*, 2019, **44**, 29946-29955.
12. P. Zou, J. Li, Y. Zhang, C. Liang, C. Yang and H. J. Fan, *Nano Energy*, 2018, **51**, 349-357.
